# Supplementary material for: Polyphenol Health Effects on Cardiovascular and Neurodegenerative Disorders: A Review and Meta-Analysis
Source: PubMed Central journal article supplement (PMC6359281; doi:10.3390/ijms20020351), 2019-01-16
Supplement: ijms-20-00351-s001.pdf [file ijms-20-00351-s001.pdf]

**Table 1.** Studies excluded from the meta-analysis on cardiovascular effects.

| Author          | Year | Compound                                      | Duration | Patients' gender | Inclusion criteria            | Study group |                 | Control group |                 | Primary endpoint          | Cardiovascular endpoint                                                   | Reason for exclusion |
|-----------------|------|-----------------------------------------------|----------|------------------|-------------------------------|-------------|-----------------|---------------|-----------------|---------------------------|---------------------------------------------------------------------------|----------------------|
|                 |      |                                               |          |                  |                               | n           | Age ( $\pm$ SD) | n             | Age ( $\pm$ SD) |                           |                                                                           |                      |
| Brüll V         | 2017 | Quercetin                                     | 6 weeks  | Both             | Metabolic syndrome            | 68          | 47.4 $\pm$ 10.5 | 68            | 47.4 $\pm$ 10.5 | Anti-inflammatory effects | Blood pressure, ET-1, ICAM-1, VCAM-1, hs-CRP, HDL-C, LDL-C, triglycerides | Duplicated           |
| Carmignani LO   | 2014 | Isoflavone                                    | 16 weeks | Female           | Postmenopausal                | 20          | 52.9 $\pm$ 3.4  | 20            | 50.9 $\pm$ 3.4  | Cardiovascular health     | Blood pressure, HDL-C-C, LDL-C-C, triglycerides                           | Data not reported    |
| Chedraui P      | 2008 | Trifolium pratense-derived isoflavone         | 12 weeks | Female           | Overweight                    | 31          | 51.3 $\pm$ 3.3  | 22            | 51.2 $\pm$ 3.9  | Lipid status              | HDL-C, LDL-C, triglycerides                                               | Data not reported    |
| Chuengsamarn S  | 2014 | Curcumin                                      | 26 weeks | Both             | Type 2 diabetes mellitus      | 107         | 59.2 $\pm$ 1.1  | 106           | 59.6 $\pm$ 1.0  | Atherosclerosis           | Triglycerides, pulse wave velocity, adiponectin                           | Data not reported    |
| Dent SB         | 2001 | Isoflavone-supplemented probiotic soy product | 24 weeks | Female           | Postmenopausal                | 69          | 50.2 $\pm$ 3.6  | 69            | 50.2 $\pm$ 3.6  | Lipid status              | HDL-C, LDL-C, triglycerides                                               | Data not reported    |
| Dower JI        | 2015 | Epicatechin                                   | 4 weeks  | Both             | Healthy subjects              | 37          | 66.4 $\pm$ 7.9  | 37            | 66.4 $\pm$ 7.9  | Endothelial function      | E-selectin                                                                | Data not reported    |
| Fenercioglu AK  | 2010 | Polyphenol-containing antioxidants            | 12 weeks | Both             | Type 2 diabetes mellitus      | 56          | 53.51 $\pm$ 6.8 | 58            | 53.9 $\pm$ 1.2  | Lipid peroxidation        | HDL-C, LDL-C, triglycerides                                               | Data not reported    |
| Rahbar AR       | 2015 | Red grape polyphenol                          | 8 weeks  | Both             | Hypercholesterolemia          | 46          | 50.5 $\pm$ 9.7  | 23            | 52.5 $\pm$ 11.5 | Lipid status              | HDL-C, LDL-C, triglycerides                                               | Data not reported    |
| Tomé-Carneiro J | 2012 | Resveratrol                                   | 26 weeks | Both             | Cardiovascular risk increased | 25          | 60 $\pm$ 12     | 25            | 58 $\pm$ 9      | Lipid status              | Apolipoprotein A-I, HDL-C, LDL-C, triglycerides                           | Duplicated           |

ET-1: endothelin-1; FMD: flow mediated dilation; HDL-C: high-density lipoprotein-cholesterol; hs-CRP: high sensitivity C-reactive protein; ICAM-1: Intercellular adhesion molecule-1; LDL-C: low-density lipoprotein-cholesterol; SD: standard deviation; VCAM-1: vascular cell adhesion molecule-1.

**Table 2.** studies excluded from the meta-analysis on neuro-cognitive effects.

| Author        | Year | Polyphenol compound               | Duration           | Patients' gender | Inclusion criteria              | Study group |                 | Control group |                 | Aim of the study          | Neurocognitive endpoints                                                                                                                              | Reason for exclusion         |
|---------------|------|-----------------------------------|--------------------|------------------|---------------------------------|-------------|-----------------|---------------|-----------------|---------------------------|-------------------------------------------------------------------------------------------------------------------------------------------------------|------------------------------|
|               |      |                                   |                    |                  |                                 | n           | Age ( $\pm$ SD) | n             | Age ( $\pm$ SD) |                           |                                                                                                                                                       |                              |
| Whyte AR      | 2018 | Wild blueberry Powder             | 24 weeks           | Both             | Self-reported memory complaints | 30          | 65–80           | 30            | 65–80           | Cognitive function        | RAVLT, visual episodic memory was assessed using an object recognition task, Corsi Blocks task                                                        | RAVLT not reported as number |
| Miller MG     | 2017 | Blueberry extract                 | 13 weeks           | Both             | Healthy subjects                | 20          | 60–75           | 20            | 60–75           | Cognitive function        | GDS, POMS, TST, trail-making test, California Verbal Learning Test, digit span task, virtual version of the Morris Water Maze, Attention Network Task | No endpoints reported        |
| Boespflug EL  | 2018 | Blueberry extract                 | 16 weeks           | Both             | Cognitive impairment            | 8           | 80.4 $\pm$ 7.3  | 8             | 75.5 $\pm$ 4.8  | Cognitive function        | BOLD, MRI, working memory task                                                                                                                        | No endpoints reported        |
| Herrlinger KA | 2018 | Spearmint extract                 | 12 weeks           | Both             | Cognitive impairment            | 30          | 59.1 $\pm$ 1.0  | 30            | 58.2 $\pm$ 1.2  | Cognition, sleep and mood | CDR, LSEQ, POMS                                                                                                                                       | No endpoints reported        |
| Bowtell JL    | 2017 | Blueberry extract                 | 12 weeks           | Both             | Healthy subjects                | 12          | 67.5 $\pm$ 3.0  | 14            | 69 $\pm$ 3.3    | Cognitive function        | MRI, Groton maze learning task, international shopping list task, back test                                                                           | No endpoints reported        |
| Gschwind YJ   | 2017 | Ginkgo biloba extract             | 52 weeks           | Both             | Cognitive impairment            | 25          | 67.8 $\pm$ 8.3  | 25            | 69 $\pm$ 8.6    | Gait stability            | Spatio-temporal gait parameters                                                                                                                       | No endpoints reported        |
| Evans HM      | 2016 | Resveratrol                       | 14 weeks           | Female           | post-menopausal women           | NA          | NA              | NA            | NA              | Cognitive function        | Rey Auditory Verbal Learning Test, Cambridge Semantic Memory Battery, the Double Span and the Trail Making Task.                                      | Methodological trial         |
| Beck SM       | 2016 | Ginkgo biloba extract             | 8 weeks            | Both             | Self-reported memory complaints | 31          | 57.5 $\pm$ 4.6  | 30            | 57.1 $\pm$ 4.4  | Cognitive function        | Task-set-switching, response-inhibition, delayed response, prospective-memory, task-related fMRI-BOLD-signals and the Trier Social Stress-Test        | No endpoints reported        |
| Wightman EL   | 2015 | Resveratrol                       | 7 weeks            | Both             | Healthy subjects                | 30          | 18–30           | 30            | 18–30           | Cognitive function        | Food consumption questionnaire, GHQ, POMS, PSQI                                                                                                       | No endpoints reported        |
| Wang LP       | 2015 | Ginkgo biloba extract and Ginseng | 12 weeks           | Both             | Vascular cognitive impairment   | 40          | 60–75           | 40            | 60–75           | Cognitive function        | MoCA, and transcranial Doppler US                                                                                                                     | No endpoints reported        |
| St John JA    | 2014 | Isoflavone-rich soy protein       | 132 weeks (96-164) | Female           | post-menopausal women           | 150         | 61 $\pm$ 7      | 150           | 61 $\pm$ 7      | Cognitive function        | Wechsler Test of Adult Reading, Center for Epidemiological Studies Depression scale (CES-D)                                                           | No endpoints reported        |

|              |      |                                     |           |        |                                         |      |              |      |              |                                          |                                                                                                                                                   |                                   |
|--------------|------|-------------------------------------|-----------|--------|-----------------------------------------|------|--------------|------|--------------|------------------------------------------|---------------------------------------------------------------------------------------------------------------------------------------------------|-----------------------------------|
| Pase MP      | 2013 | Cocoa polyphenols                   | 4 weeks   | Both   | Healthy subjects                        | 25   | 51.15 ± 7.88 | 22   | 52.98 ± 7.65 | Cognitive function and mood              | Working Memory, Episodic Secondary Memory, Power of Attention, Speed of Memory and Continuity of Attention, Bond and Lader Visual Analogue Scales | No endpoints reported             |
| Mohamed S    | 2013 | Catechin-rich oil palm leaf extract | 8 weeks   | Both   | Healthy subjects                        | 15   | NA           | 15   | NA           | Cognitive function                       | Short-term memory ability, Processing speed ability, Spatial visualisation learning ability                                                       | No endpoints reported             |
| Zhang SJ     | 2012 | Ginkgo biloba extract               | 12 weeks  | Both   | Vascular cognitive impairment           | 40   | 66.5 ± 5.6   | 40   | 66.5 ± 5.6   | Cognitive function                       | Montreal cognitive assessment (MoCA) and transcranial Doppler US                                                                                  | No endpoints reported             |
| Herrschaft H | 2012 | Ginkgo biloba extract               | 24 weeks  | Both   | Patients with mild to moderate dementia | 200  | 65.1 ± 8.8   | 202  | 64.9 ± 9.4   | Cognitive function                       | NPI, SKT, ADCS, Verbal Fluency Test, ADL-IS,, DEMQOL                                                                                              | No endpoints reported             |
| Maki PM      | 2009 | Red clover, black cohosh            | 52 weeks  | Female | post-menopausal women                   | 49   | 51.6 ± 5.1   | 17   | 52.6 ± 4.3   | Cognitive function                       | CVLT, LMT, BVRT, PANAS                                                                                                                            | No endpoints reported             |
| DeKosky ST   | 2008 | Ginkgo biloba extract               | 312 weeks | Both   | Cognitive impairment                    | 1545 | 79.1 ± 3.3   | 1524 | 79.1 ± 3.3   | Dementia and Alzheimer disease incidence | CVLT, Rey Ostermieth Figure, WAIS, Trail making test, stroop color                                                                                | Only results about adverse events |
| Ryan J       | 2008 | Pycnogenol                          | 12 weeks  | Both   | Healthy subjects                        | 49   | 66.9 ± 5.3   | 52   | 68.4 ± 5.6   | Cognitive function                       | CDR, WASI                                                                                                                                         | No endpoints reported             |
| Dodge HH     | 2008 | Ginkgo biloba extract               | 168 weeks | Both   | Healthy subjects                        | 60   | 87.14 ± 2.14 | 58   | 87.43 ± 2.22 | Risk of dementia progression             | MMSE                                                                                                                                              | Only regression analyses reported |
| Burns NR     | 2006 | Ginkgo biloba extract               | 12 weeks  | Both   | Healthy subjects                        | 46   | 61.2 ± 5.7   | 47   | 62.2 ± 5.3   | Cognitive function                       | Woodcock-Johnson Psycho-Educational Battery-Revised, 'odd-man-out' reaction time (OMO) task                                                       | No endpoints reported             |
| File SE      | 2005 | Isoflavone-rich soy protein         | 6 weeks   | Female | post-menopausal women                   | 25   | 57.4 ± 0.7   | 25   | 58.6 ± 0.8   | Cognitive function                       | Green climateric scale, HADS, BLMD                                                                                                                | No endpoints reported             |
| Elsabagh S   | 2005 | Ginkgo biloba extract               | 6 weeks   | Both   | Healthy subjects                        | 20   | 22.3 ± 0.3   | 20   | 21.7 ± 0.4   | Cognitive function                       | HADS, SWM, CANTAB, PASAT                                                                                                                          | No endpoints reported             |

|            |      |                                                 |          |        |                         |     |             |     |             |                                     |                                                                                                                                                        |                               |
|------------|------|-------------------------------------------------|----------|--------|-------------------------|-----|-------------|-----|-------------|-------------------------------------|--------------------------------------------------------------------------------------------------------------------------------------------------------|-------------------------------|
| Elsabagh S | 2005 | Ginkgo biloba extract                           | 6 weeks  | Female | post-menopausal women   | 45  | 55.3 ± 0.6  | 42  | 55.5 ± 0.6  | Cognitive function                  | HADS, Green Climateric Scale, PASAT                                                                                                                    | No endpoints reported         |
| Hartley DE | 2004 | Ginkgo biloba and Ginseng                       | 12 weeks | Female | post-menopausal women   | 30  | 58.4 ± 1.0  | 27  | 57.4 ± 0.7  | Cognitive function and mood         | HADS, PASAT                                                                                                                                            | No endpoints reported         |
| Howes JB   | 2003 | Extract of aglycone isoflavones from red clover | 24 weeks | Female | post-menopausal women   | 19  | 62 ± 2      | 19  | 62 ± 2      | Cognitive function                  | Test of visual-spatial intelligence, verbal memory test, digit recall test                                                                             | No endpoints reported         |
| Mattes RD  | 2004 | Ginkgo biloba extract                           | 13 weeks | Both   | Healthy subjects        | 21  | 24.1 ± 1.2  | 18  | 23.1 ± 1.3  | Alertness and chemosensory function | Profile of Mood States, letter cancellation-task                                                                                                       | No endpoints reported         |
| Kok L      | 2004 | Isoflavone-rich soy protein                     | 52 weeks | Female | post-menopausal women   | 100 | 66.6 ± 4.8  | 102 | 66.8 ± 4.7  | Cognitive function                  | RAVLT, WAIS, MMSE, Geriatric Depression Scale                                                                                                          | Only study design description |
| Duffy R    | 2003 | Isoflavone-rich soy protein                     | 12 weeks | Female | post-menopausal women   | 18  | 58.8 ± 1.1  | 15  | 56.8 ± 1.0  | Cognitive function                  | HADS, DMTS                                                                                                                                             | No endpoints reported         |
| Cieza A    | 2003 | Ginkgo biloba extract                           | 4 weeks  | Both   | Healthy subjects        | 34  | 56.5 ± 3.8  | 32  | 56.3 ± 3.8  | Cognitive function                  | ITVS, DCT-G, POMS, SIS-M, SDS, Finger tapping test-personal tempo, Finger tapping test-speed, Auditory choice reaction time, Color word test, AOT, SMS | No endpoints reported         |
| Stough C   | 2001 | Ginkgo biloba extract                           | 4 weeks  | Both   | Healthy subjects        | 25  | 18-40       | 25  | 18-40       | Cognitive function                  | Trail Making Test, RAVLT, WAIS                                                                                                                         | Only study design description |
| Wesnes KA  | 2000 | Ginkgo biloba/Panax ginseng                     | 12 weeks | Both   | Healthy subjects        | 125 | 38-66       | 125 | 38-66       | Cognitive function                  | CDR                                                                                                                                                    | Only study design description |
| Wesnes KA  | 1997 | Ginkgo biloba extract                           | 12 weeks | Both   | Neurasthenic complaints | 48  | 40-65       | 16  | 40-65       | Cognitive function                  | CDR, Computerized assessment system, Vienna Determination Unit                                                                                         | No endpoints reported         |
| Rai GS     | 1991 | Ginkgo biloba extract                           | 24 weeks | Both   | Memory impairment       | 12  | 73.4 ± 7.25 | 15  | 78.3 ± 5.93 | Cognitive function                  | MMSE, Kendrick Battery for the detection of dementia                                                                                                   | No endpoints reported         |

ADL-IS: Activities of Daily Living International Scale; AOT: Auditory order threshold test; BLMD: Bond and Lader Mood Scale; CANTAB: Cambridge Neuropsychological Test Automated Battery; DCT-G: Digit connection test-G; DMTS: Delayed Matching To Sample Test; HADS: Hospital Anxiety and Depression Scales; HKLT: Hong Kong List-Learning Test; ITVS: Test's increment threshold for visual stimuli; MMSE: Mini Mental State Examination; NA: not available; NPI: Neuropsychiatric Inventory; PASAT: Paced Auditory Serial Addition Task; POMS: profile of mood states; RAVLT: Rey Auditory Verbal Learning Test; SD: standard

deviation; SDS: self-rating depression scale including; SIS-M: subjective intensity scale-mood; SMS: Sensorimotor synchronization test; SRT: Selective Reminding Test ; SWM: spatial working memory; WMS: Weschler Memory Scale.

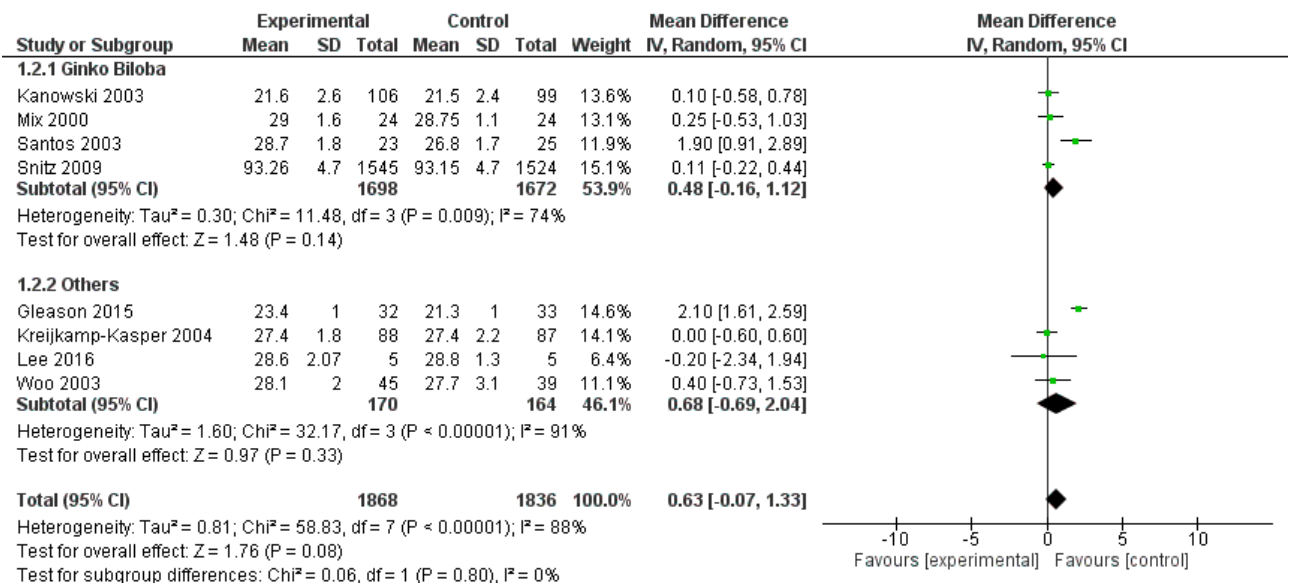

Figure 1. Pooled analysis of the impact of polyphenols on Mini-Mental State Examination (MMSE).

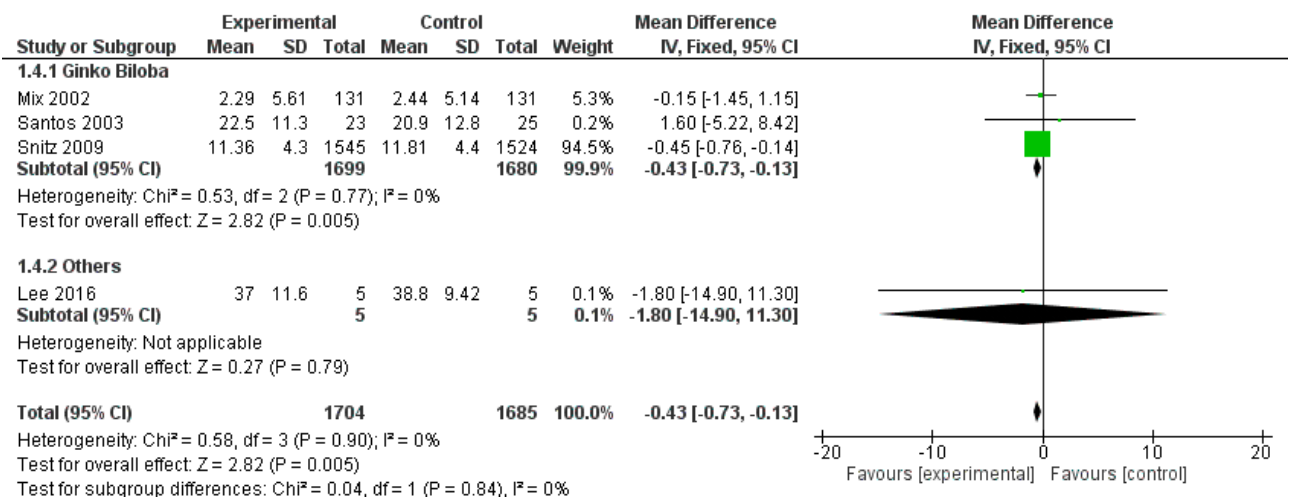

Figure 2. Pooled analysis of the impact of polyphenols on Wechsler Adult Intelligence Scale (WAIS) Block Design field.

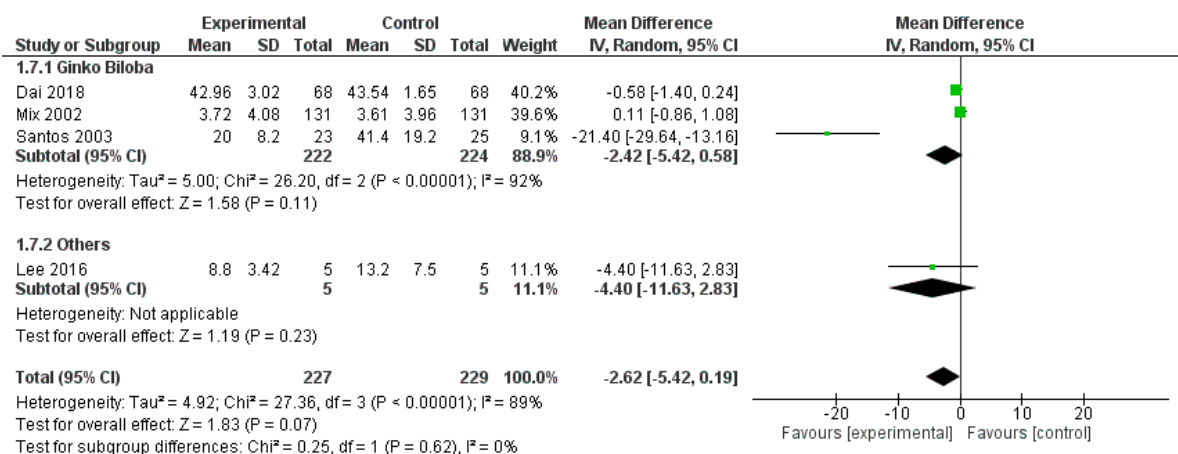

Figure 3. Pooled analysis of the impact of polyphenols on Wisconsin Card Classification Test (WCST).

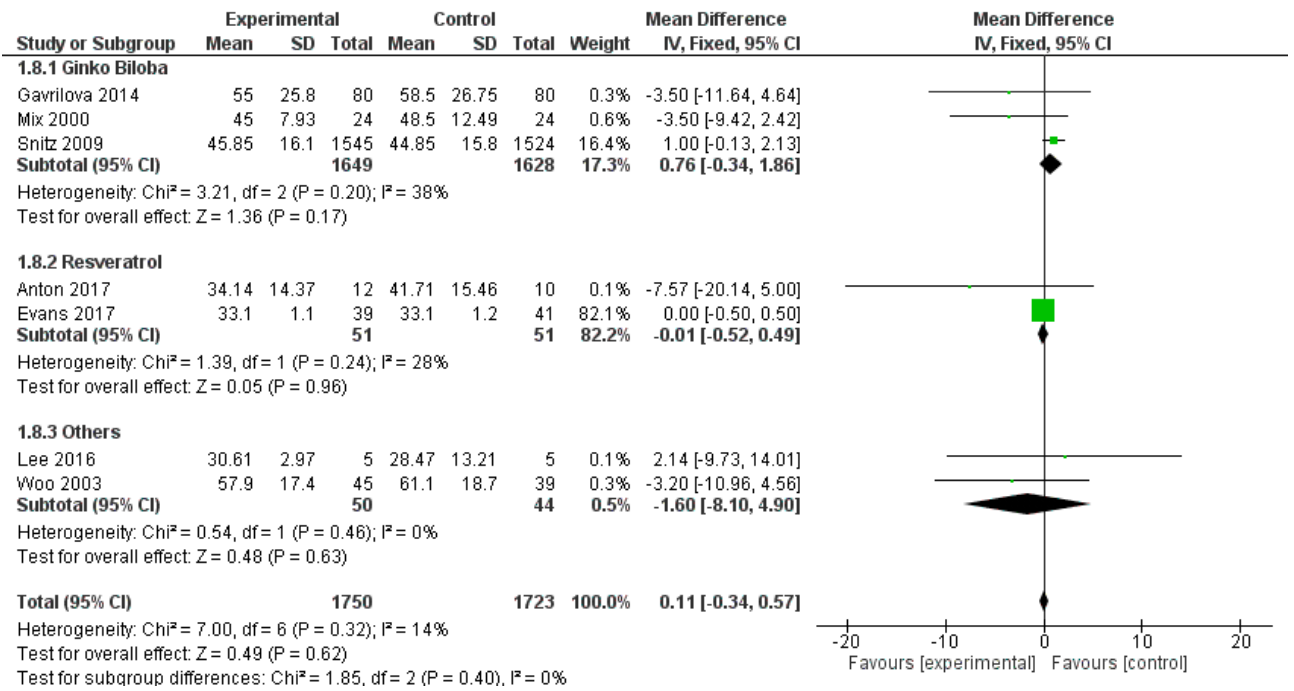

**Figure 4.** Pooled analysis of the impact of polyphenols on Trail Making Test A.
